# Supplementary material for: DNMT1 facilitates proliferation and metastasis of breast cancer by inducing MEG3 promoter methylation in MEG3/miR-494-3p/OTUD4 regulatory axis
Source: Research Square preprint supplement (doi:10.21203/rs.3.rs-27423/v2), 2020-12-10
Supplement: Supplementary file 1 [file 9f17a14b736e9bc0c47fc5d0.docx]

Primers for silencing MEG3, DNMT1 and OTUD4:

| ID | Primer (5’-3’) |
| --- | --- |
| sh-DNMT1-1 | GCUACGAGAUCGAGUUCAUTT |
| sh-DNMT1-2 | GGGACUGUGUCUCUGUUAUTT |
| sh-OTUD4-1 | CAGAGAGAAATTTGAAGCGT |
| sh-OTUD4-2 | AGTATAAAGAAAGCTCTGCT |
| sh-MEG3-1 | AACAGCAAAUGGCACAGGAAGAGACGC |
| sh-MEG3-2 | AUUGGAGGUGAGGAAGGAAAGCAGC |

Primers for CHIP：

| ID | Forward primer | Reverse primer | Product length |
| --- | --- | --- | --- |
| Primer | ACGGTCAATGTTCACCTCCC | CCAACGATCCCACAAGGTGA | 115 |
